# Supplementary material
Source: PubMed Central journal article supplement (PMC8058047)
Supplement: mmc1.pdf [file mmc1.pdf]

## Journal of Hepatology

### CTAT methods

Tables for a “Complete, Transparent, Accurate and Timely account” (CTAT) are now mandatory for all revised submissions. The aim is to enhance the reproducibility of methods.

- Only include the parts relevant to your study
- Refer to the CTAT in the main text as ‘Supplementary CTAT Table’
- Do not add subheadings
- Add as many rows as needed to include all information
- Only include one item per row

If the CTAT form is not relevant to your study, please outline the reasons why:

|  |
|--|
|  |
|--|

#### 1.1 Antibodies

| Name                        | Citation | Supplier                 | Cat no.   | Clone no. |
|-----------------------------|----------|--------------------------|-----------|-----------|
| Liason SARS-CoV-2 S1/S2 IgG |          | Diasorin, Sauggia, Italy |           |           |
| SARS-CoV-2-IgG              |          | Abbott laboratories, USA | H14806R05 |           |

#### 1.2 Cell lines

| Name | Citation | Supplier | Cat no. | Passage no. | Authentication test method |
|------|----------|----------|---------|-------------|----------------------------|
|      |          |          |         |             |                            |

#### 1.3 Organisms

| Name | Citation | Supplier | Strain | Sex | Age | Overall n number |
|------|----------|----------|--------|-----|-----|------------------|
|      |          |          |        |     |     |                  |

#### 1.4 Sequence based reagents

| Name | Sequence | Supplier |
|------|----------|----------|
|      |          |          |

#### 1.5 Biological samples

| Description | Source | Identifier |
|-------------|--------|------------|
|             |        |            |

#### 1.6 Deposited data

| Name of repository | Identifier | Link |
|--------------------|------------|------|
|                    |            |      |

## 1.7 Software

| Software name                   | Manufacturer                   | Version    |
|---------------------------------|--------------------------------|------------|
| IBM SPSS Statistics for Windows | (IBM Corp., Armonk, N.Y., USA) | version 22 |

## 1.8 Other (e.g. drugs, proteins, vectors etc.)

|  |  |  |
|--|--|--|
|  |  |  |
|  |  |  |

## 1.9 Please provide the details of the corresponding methods author for the manuscript:

Halperin tami- Department of Infectious Diseases, Tel-Aviv Sourasky Medical Center, and Sackler Faculty of Medicine, Tel-Aviv University, Tel-Aviv, Israel.  
Email- [tamihal@tlvmc.gov.il](mailto:tamihal@tlvmc.gov.il)  
Tel- +972-52-7360564

## 2.0 Please confirm for randomised controlled trials all versions of the clinical protocol are included in the submission. These will be published online as supplementary information.

|  |
|--|
|  |
|--|
